# Supplementary material for: Stress-induced stabilization of the photoactive FAPbI3 phase under ambient conditions without using an additive approach
Source: Royal Society of Chemistry journal article supplement (doi:10.1039/d4ya00092g), 2024-01-01
Supplement: d4ya00092g3.pdf [file d4ya00092g3.pdf]

## Supporting Information

### Stress-induced stabilization of photoactive FAPbI<sub>3</sub> phase in ambient conditions without using an additive approach

Shivam Porwal<sup>a</sup>, Nitin Kumar Bansal<sup>b</sup>, Subrata Ghosh<sup>a</sup>, and Trilok Singh<sup>a,b\*</sup>

<sup>a</sup>School of Energy Science and Engineering, Indian Institute of Technology Kharagpur, 721302, India

<sup>b</sup>Semiconductor Thin Film and Emerging Photovoltaic Laboratory, Department of Energy Science and Engineering, Indian Institute of Technology Delhi, Hauz Khas, New Delhi 110016, India

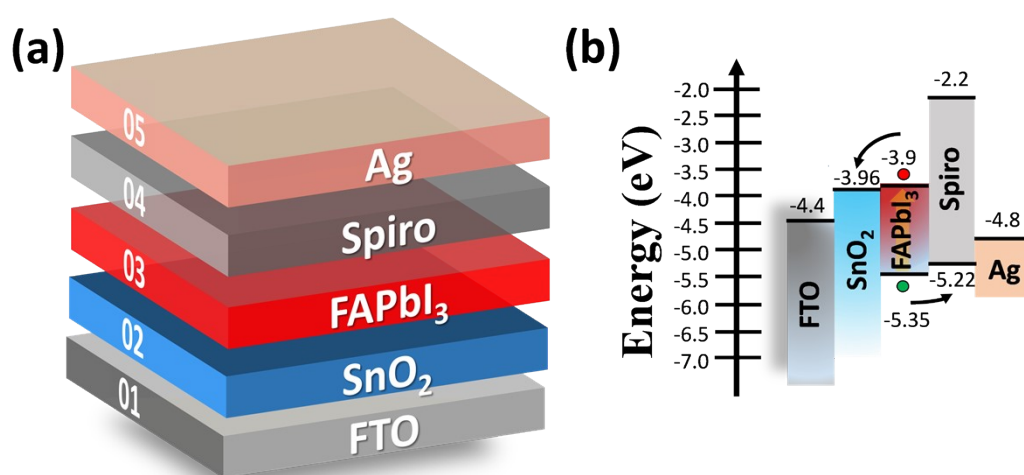

**Figure S1:** Schematic of Perovskite solar cells (a) Device architecture, and (b) Energy-Band diagram of the device. The energy band positions have been taken from various references.<sup>1-5</sup>

**Table S1:** Systematic exploration of solvent ratio and anti-solvent selection in conjunction with Two and Three-Step spin coating parameters for the deposition of Perovskite Films on both SnO<sub>2</sub>-coated FTO substrates and Glass substrates.

Note: The perovskite Films formed under RH = 20-28%, Temperature = 24-30 °C.

| Solvent         | FAI: PbI <sub>2</sub> Molar Ratio | Anti-solvent  | Annealing Temperature (°C) | Formation of $\alpha$ -FAPbI <sub>3</sub> With spin coating parameters |
|-----------------|-----------------------------------|---------------|----------------------------|------------------------------------------------------------------------|
| DMF: DMSO (9:1) | 1.5 M<br>1 M<br>0.7 M             | Chlorobenzene | 150-170                    | 2-step; N                                                              |
|                 |                                   | Toluene       |                            | 3-step; N                                                              |
|                 |                                   | Ethyl Acetate |                            |                                                                        |
| DMF: DMSO (4:1) | 1.5 M<br>1 M<br>0.7 M             | Chlorobenzene | 150-170                    | 2-step; N                                                              |
|                 |                                   | Toluene       |                            | 3-step; N                                                              |
|                 |                                   | Ethyl Acetate |                            |                                                                        |

|                    |                       |                                           |         |                                                                                                       |
|--------------------|-----------------------|-------------------------------------------|---------|-------------------------------------------------------------------------------------------------------|
| DMF:<br>DMSO (3:1) | 1.5 M<br>1 M<br>0.7 M | Chlorobenzene<br>Toluene<br>Ethyl Acetate | 150-170 | 2-step; N<br>3-step; Y only with 0.7M<br>ratio of FAI: PbI <sub>2</sub> but not<br>with Ethyl Acetate |
|--------------------|-----------------------|-------------------------------------------|---------|-------------------------------------------------------------------------------------------------------|

N: Perovskite film not formed; Y: Perovskite film formed.

**Table S2:** Optimization of spin coating parameters, anti-solvent dripping duration, anti-solvent volume, and annealing temperature for the precision fabrication of Perovskite Films on Glass substrates and SnO<sub>2</sub>-coated FTO substrates.

| Spin coating Steps | Spin coating parameters                              | Anti-solvent Dripping During the deposition process | Anti-solvent                       | Temperature (°C) | Formation of $\alpha$ -FAPbI <sub>3</sub>                        |
|--------------------|------------------------------------------------------|-----------------------------------------------------|------------------------------------|------------------|------------------------------------------------------------------|
| 2-step             | 1200 rpm, 15 sec<br>5000 rpm, 30 sec                 | 15 <sup>th</sup> sec of second step                 | Chlorobenzene<br>(250-300 $\mu$ L) | 150-170          | Not formed                                                       |
| 2-step             | 1200 rpm, 15 sec<br>5000 rpm, 30 sec                 | 15 <sup>th</sup> sec of second step                 | Toluene<br>(250-300 $\mu$ L)       | 150-170          | Not formed                                                       |
| 3-step             | 500 rpm, 5sec<br>3500 rpm, 5 sec<br>5000 rpm, 30 sec | Ending of second step                               | Chlorobenzene<br>(250-300 $\mu$ L) | 150-170          | Very poor-quality film formed                                    |
| 3-step             | 500 rpm, 5sec<br>3500 rpm, 5 sec<br>5000 rpm, 30 sec | Ending of second step                               | Toluene<br>(250-300 $\mu$ L)       | 150-170          | Poor quality film formed                                         |
| 3-step             | 500 rpm, 5sec<br>3500 rpm, 5 sec<br>5000 rpm, 30 sec | During acceleration of 3 <sup>rd</sup> step         | Toluene<br>(250-300 $\mu$ L)       | 150-170          | Poor quality film formed but slide improvement from previous one |
| 3-step             | 500 rpm, 5sec<br>3500 rpm, 5 sec<br>5000 rpm, 30 sec | Starting of third step                              | Toluene<br>(250-300 $\mu$ L)       | 150-170          | Poor quality film formed but slide improvement from previous one |
| 3-step             | 500 rpm, 5sec<br>3500 rpm, 5 sec<br>5000 rpm, 30 sec | 7 <sup>th</sup> sec of third step                   | Toluene<br>(250-300 $\mu$ L)       | 150-170          | Poor quality film formed but slide improvement from previous one |
| 3-step             | 500 rpm, 5sec                                        | 12 <sup>th</sup> sec of third step                  | Toluene                            | 150-170          | Poor quality film formed but slide improvement                   |

|               |                                                                           |                                                      |                                           |            |                                                                    |
|---------------|---------------------------------------------------------------------------|------------------------------------------------------|-------------------------------------------|------------|--------------------------------------------------------------------|
|               | 3500 rpm, 5 sec<br>5000 rpm, 30 sec                                       |                                                      | (250-300 $\mu$ L)                         |            | from previous one                                                  |
| 3-step        | 500 rpm, 5sec<br>3500 rpm, 5 sec<br>5000 rpm, 30 sec                      | 15 <sup>th</sup> sec of<br>third step                | Toluene<br>(250-300 $\mu$ L)              | 150-170    | Good quality film formed                                           |
| 3-step        | 500 rpm, 5sec<br>3500 rpm, 5 sec<br>5000 rpm, 30 sec                      | 15 <sup>th</sup> sec of<br>third step                | Toluene<br>(250 $\mu$ L)                  | 150-170    | Good quality film formed<br>slide improvement from<br>previous one |
| <b>3-step</b> | <b>500 rpm, 5sec</b><br><b>3500 rpm, 5 sec</b><br><b>5000 rpm, 30 sec</b> | <b>15<sup>th</sup> sec of<br/>the third<br/>step</b> | <b>Toluene<br/>(250<math>\mu</math>L)</b> | <b>150</b> | <b>Very Good quality film<br/>formed</b>                           |
| 3-step        | 500 rpm, 5sec<br>3500 rpm, 5 sec<br>5000 rpm, 30 sec                      | 18 <sup>th</sup> sec of<br>the third<br>step         | Toluene<br>(250 $\mu$ L)                  | 150        | Very poor-quality film<br>formed                                   |

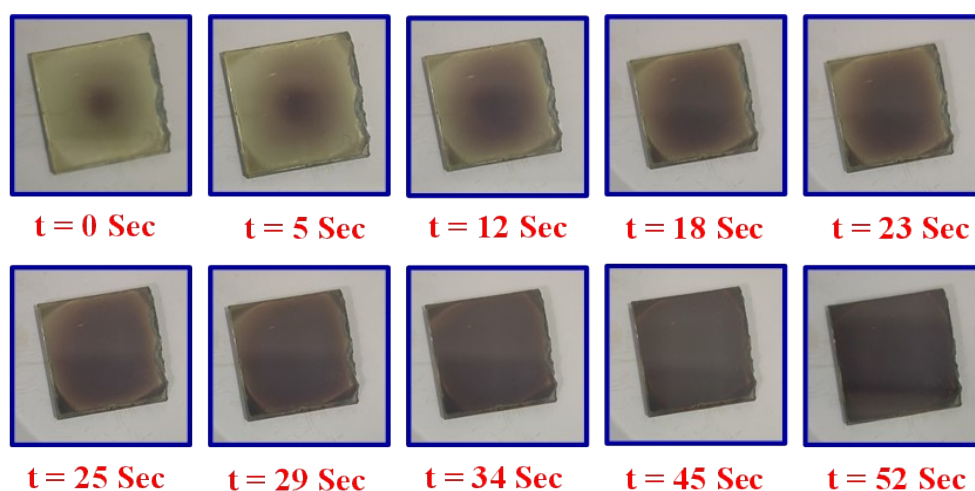

**Figure S2:** Phase transformation images from intermediate to FAPbI<sub>3</sub> phase with different time intervals after reaching 150 °C.

**Table S3:** Theoretical stress calculation at various temperatures, while perovskite solution temperature was constant at 70°C.

| $E_P / 1 - \nu_P$ | $\alpha_s - \alpha_P$    | $\alpha_g - \alpha_P$    | Substrate Temperature (°C) | $\Delta T$ | Stress in Sample S1 (MPa)   | Stress in Sample S2 (MPa)  |
|-------------------|--------------------------|--------------------------|----------------------------|------------|-----------------------------|----------------------------|
| 15.857 GPa        | $10^{-5} \text{ K}^{-1}$ | $10^{-4} \text{ K}^{-1}$ | 30                         | +40        | +63.43                      | +6.34                      |
|                   |                          |                          | 40                         | +30        | +47.57                      | +4.75                      |
|                   |                          |                          | 50                         | +20        | +31.71                      | +3.17                      |
|                   |                          |                          | 60                         | +10        | +15.85                      | +1.58                      |
|                   |                          |                          | 70                         | 0          | 0                           | 0                          |
|                   |                          |                          | 80                         | -10        | -15.85 (Compressive stress) | -1.58 (Compressive stress) |

11/28/2022 10:48:21 AM  
 Project: Stress\_2D  
 Operator: Lab Manager  
 Sample:  
 Site:

**Sample**

| Material           | H K L | Wavelength | 2Theta | Poisson | Young  | S1        | 1/2 S2   | Arx   |
|--------------------|-------|------------|--------|---------|--------|-----------|----------|-------|
| FAPbI <sub>3</sub> | 0 0 1 | Cu_Ka1     | 14.100 | 0.300   | 111000 | -2.703E-6 | 1.171E-5 | 1.000 |

Measured:  
25-Nov-2022

Peak Evaluation Method:  
Sliding Gravity  
( 10, 20, 30, 40, 50, 60, 70, 80 )

Stress Model:  
Normal  
Normal:  
1408.7 ± 174.0

Pseudo-Hydro:  
- - ± - -

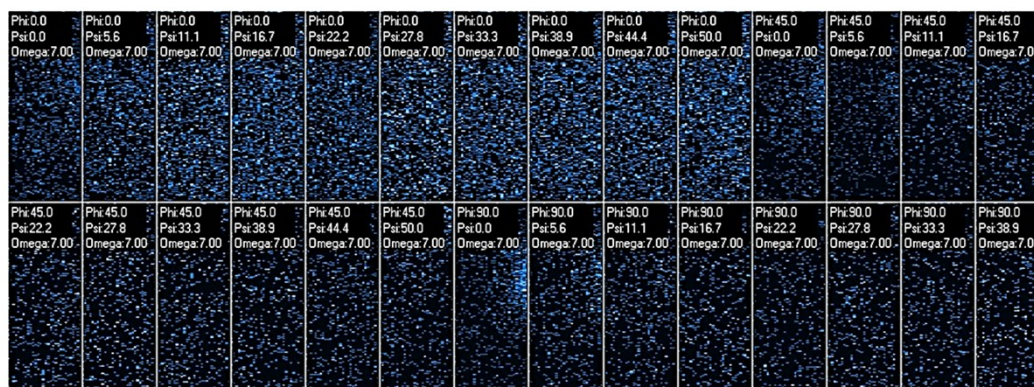

**Figure S3:** Stress analysis of Glass/FTO/SnO<sub>2</sub>/FAPbI<sub>3</sub> based film using XRD

11/28/2022 10:54:09 AM  
 Project: Stress\_2D  
 Operator: Lab Manager  
 Sample:  
 Site:

**Sample**

| Material           | H K L | Wavelength | 2Theta | Poisson | Young  | S1        | 1/2 S2   | Arx   |
|--------------------|-------|------------|--------|---------|--------|-----------|----------|-------|
| FAPbI <sub>3</sub> | 0 0 1 | Cu_Ka1     | 14.100 | 0.300   | 111000 | -2.703E-6 | 1.171E-5 | 1.000 |

Measured:  
25-Nov-2022

Peak Evaluation Method:  
Gravity (30)

Stress Model:  
Normal  
Normal:  
29.6 ± 50.2

Pseudo-Hydro:  
-/- ± -/-

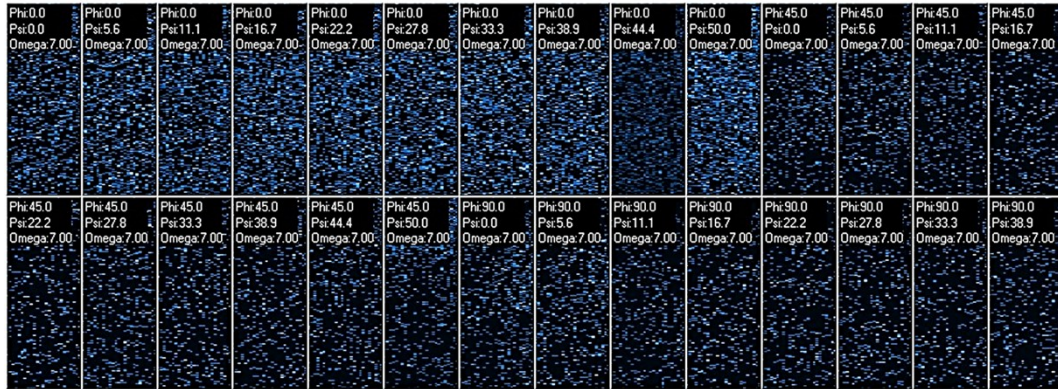

**Figure S4:** Stress analysis of Glass/FAPbI<sub>3</sub> based film using XRD.

**Table S4:** Mechanical properties and XRD peak at (001) of FAPbI<sub>3</sub> film.<sup>6-8</sup>

|                 |              |
|-----------------|--------------|
| <b>Plane</b>    | <b>(001)</b> |
| $2\theta$       | 14.1         |
| Poisson's ratio | 0.3          |
| Young Modulus   | 11.1 GPa     |

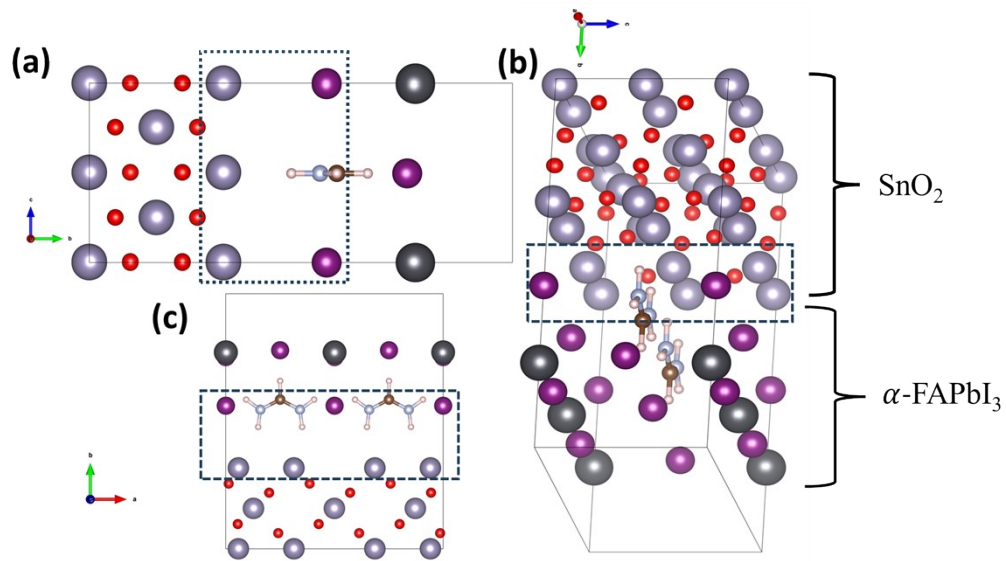

**Figure S5:** Shows the atomic structure model of the  $\text{FAPbI}_3/\text{SnO}_2$  interfacial mismatch (dotted lines) at the different axis, (a) 2D structure in the b-c direction, (b) 3D structure, and (c) 2D structure in the a-b direction.



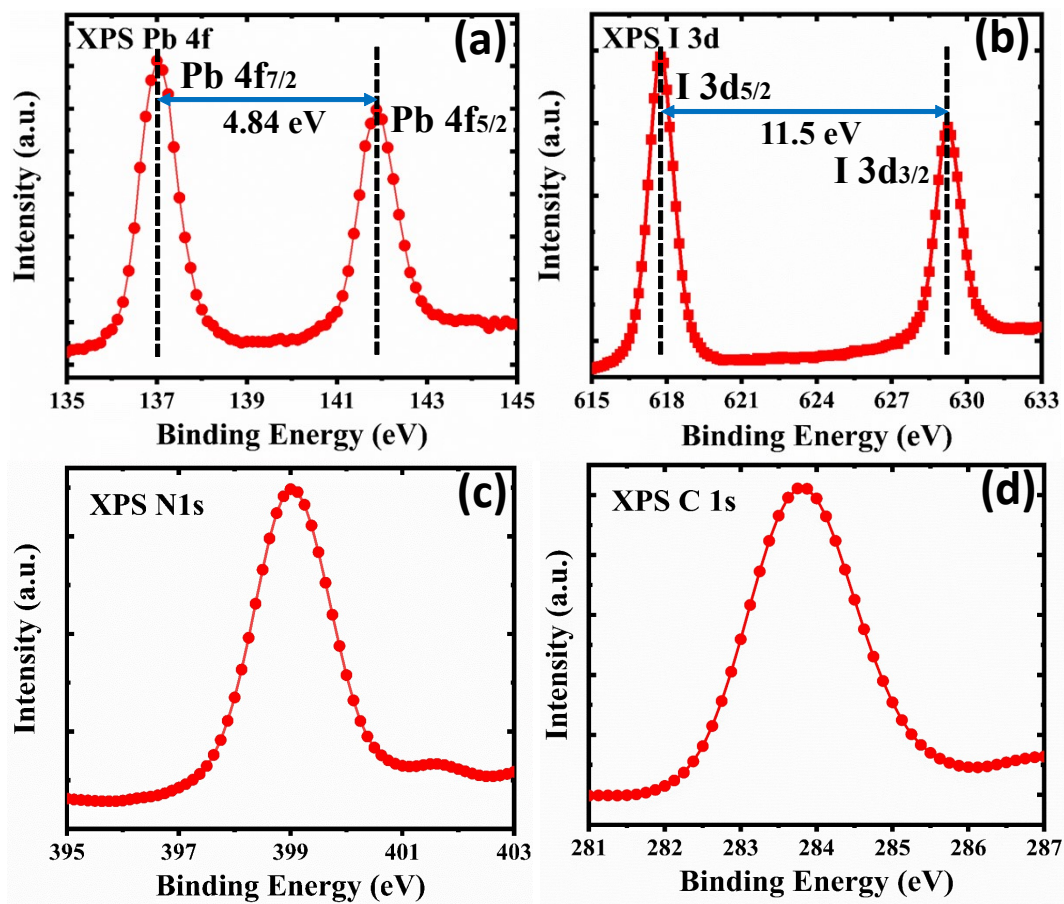

Figure S6: XPS spectra of FAPbI<sub>3</sub> film; (a) Pb 4f, (b) I 3d, (c) N1s, and (d) C1s.

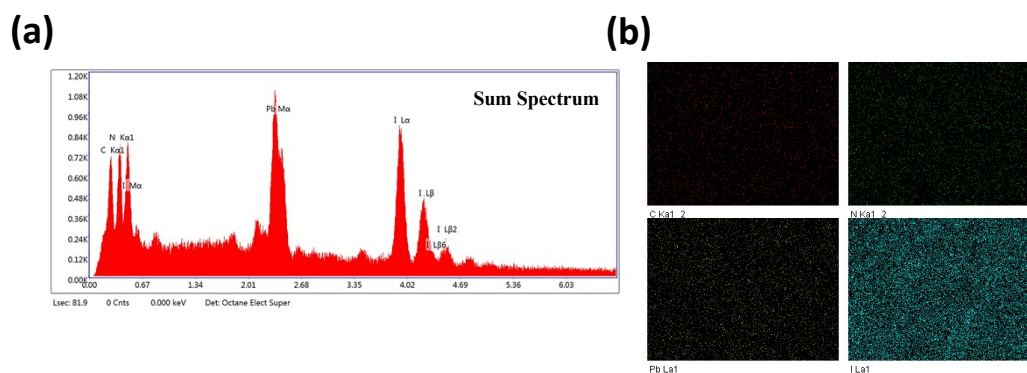

Figure S7: EDS Spectral analysis; (a) EDS sum spectrum of FAPbI<sub>3</sub>, and (b) Elemental mapping of C, N, Pb and I in the perovskite structure

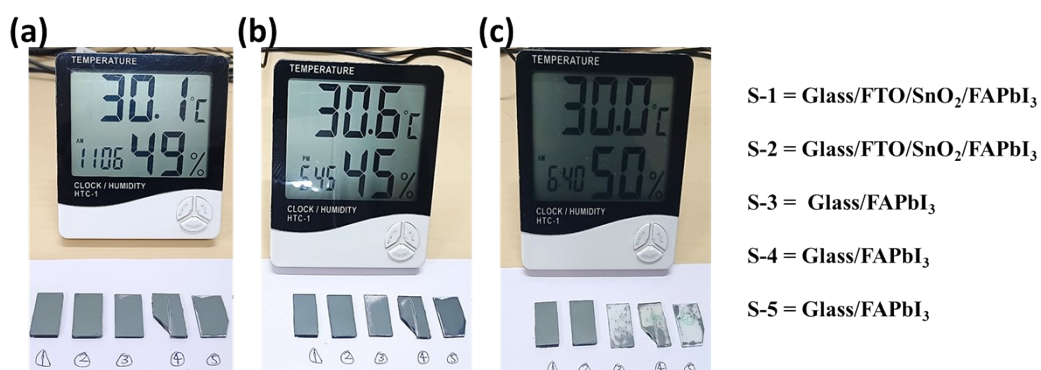

**Figure S8:** Stability of  $\alpha$ -FAPbI<sub>3</sub> film at different substrates; (a) At 0-hour (fresh film), (b) film after 6 hours, and (c) film after 20 hours.

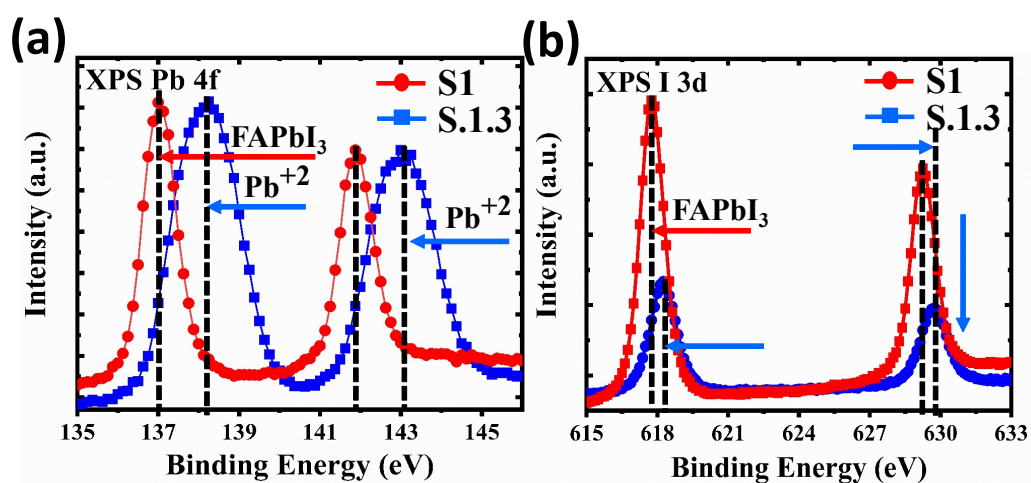

**Figure S9:** XPS spectra of Pb 4f, I 3d (S1) fresh film, and (S1.3) three months aged sample.



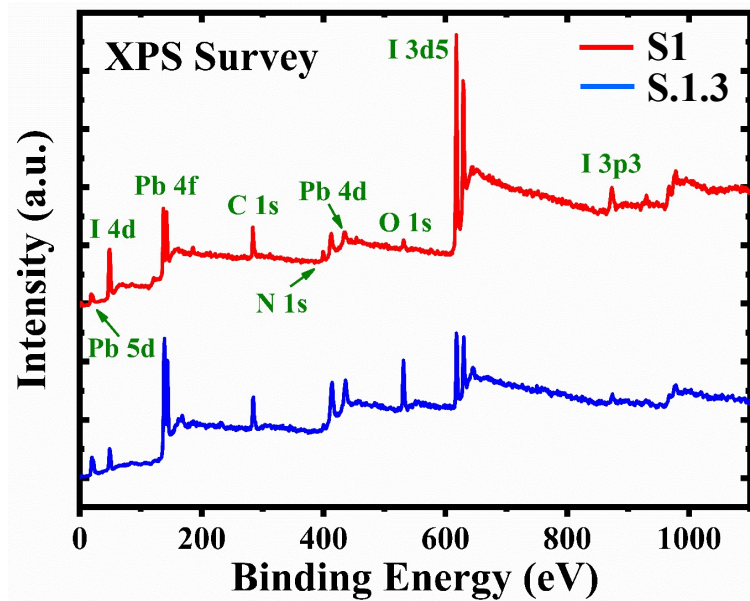

**Figure S10:** XPS survey of; (S1) fresh film, and (S1.3) three months aged sample.

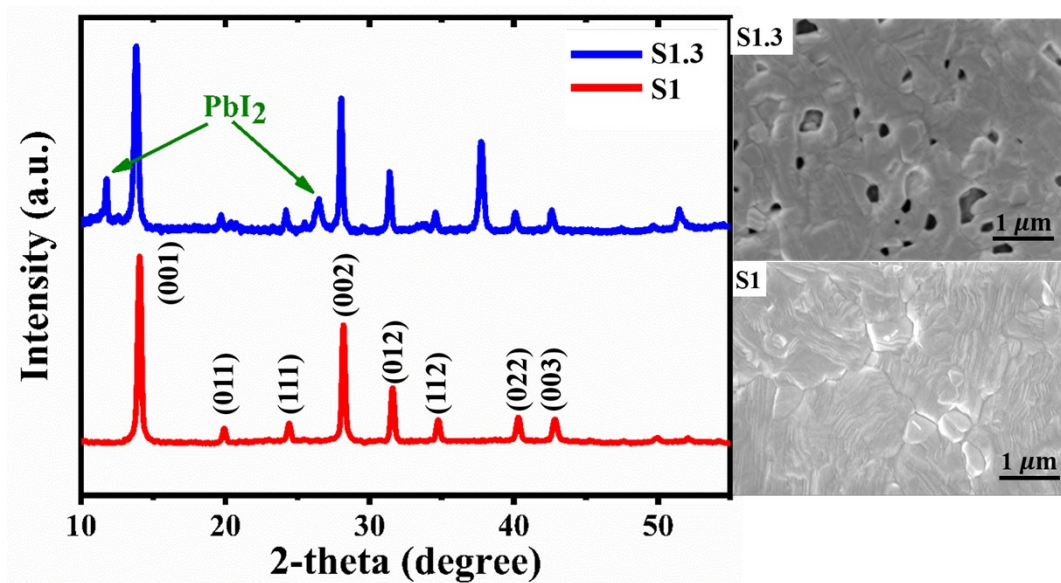

**Figure S11:** XRD pattern and SEM images (top-view) of  $\alpha$ -FAPbI<sub>3</sub> film on Glass/FTO/SnO<sub>2</sub> coated substrates; (S1) fresh film, and (S1.3) three months aged sample.

**Table S5:** Average experimental data for the photovoltaic performance of 25 devices in reverse direction.

| Device data of 25 cells | $J_{SC}$ (mA/cm <sup>2</sup> ) | $V_{OC}$ (V)      | FF (%)         | Efficiency (%)  |
|-------------------------|--------------------------------|-------------------|----------------|-----------------|
|                         | $25.7 \pm 0.5$                 | $1.031 \pm 0.024$ | $68.2 \pm 5.4$ | $18.26 \pm 2.2$ |

## References:

1. Y. Chen, Y. Lei, Y. Li, Y. Yu, J. Cai, M.-H. Chiu, R. Rao, Y. Gu, C. Wang, W. Choi, H. Hu, C. Wang, Y. Li, J. Song, J. Zhang, B. Qi, M. Lin, Z. Zhang, A. E. Islam, B. Maruyama, S. Dayeh, L.-J. Li, K. Yang, Y.-H. Lo and S. Xu, *Nature*, 2020, **577**, 209-215.
2. J. Zhao, Y. Zhang, X. Zhao, J. Zhang, H. Wang, Z. Zhu and Q. Liu, *ACS Applied Energy Materials*, 2019, **2**, 2034-2042.
3. J. H. Lee, D. Shin, R. Rhee, S. Yun, K. M. Yeom, D. H. Chun, S. Lee, D. Kim, Y. Yi, J. H. Noh and J. H. Park, *The Journal of Physical Chemistry Letters*, 2019, **10**, 6545-6550.
4. D. Liu, S. Ren, X. Ma, C. Liu, L. Wu, W. Li, J. Zhang and L. Feng, *RSC Advances*, 2017, **7**, 8295-8302.
5. J. Wang, J. Li, Y. Zhou, C. Yu, Y. Hua, Y. Yu, R. Li, X. Lin, R. Chen, H. Wu, H. Xia and H.-L. Wang, *Journal of the American Chemical Society*, 2021, **143**, 7759-7768.
6. M. Dailey, Y. Li and A. D. Printz, *ACS Omega*, 2021, **6**, 30214-30223.
7. S. Sun, F. H. Isikgor, Z. Deng, F. Wei, G. Kieslich, P. D. Bristowe, J. Ouyang and A. K. Cheetham, *ChemSusChem*, 2017, **10**, 3740-3745.
8. E. C. Schueller, G. Laurita, D. H. Fabini, C. C. Stoumpos, M. G. Kanatzidis and R. Seshadri, *Inorganic Chemistry*, 2018, **57**, 695-701.
